# Supplementary material for: Highly Enhanced Catalytic Stability of Copper by the Synergistic Effect of Porous Hierarchy and Alloying for Selective Hydrogenation Reaction
Source: MDPI journal article supplement (doi:10.3390/catal12010012), 2021-12-24
Supplement: s1 [file s1]

Archive with 1 entries (1 files):
- catalysts-1520254-supplementary.pdf
